# Supplementary material for: Effects of Fingerroot (Boesenbergia pandurata) Oil on Microflora as an Antimicrobial Agent and on the Formation of Heterocyclic Amines in Fried Meatballs
Source: MDPI journal article supplement (doi:10.3390/app14020712), 2024-01-14
Supplement: s1 [file s1]

## Supplementary data

Analysis of fingerroot oil by GC/MS

The essential oil of fingerroot (EOF) was purchased from Thai - China Flavours and Fragrances Industry Co., Ltd. (Ayutthaya, Thailand)

EOF was obtained by steam distillation. Composition of essential oils was determined by Gas Chromatography-Mass Spectrometry, Shimadzu capillary GC-quadrupole MS system QP 5050A, Kyoto, Japan

Column: J&W DB-5 60 m x 0.25 mL, film thickness 0.25  $\mu$ m Sample size, 1  $\mu$ L

Injection temperature: 250 °C

Detector temperature: 250 °C Split ratio: 1:7

Carrier gas: helium Flow rate: 1.2 mL/min

Temperature program: (a)start at 60 °C for 3 min (b) 60-80 °C (1.5 °C/min) and 80-200 °C (3 °C/min)

Figure S1. Chromatogram of fingerroot oil with composition

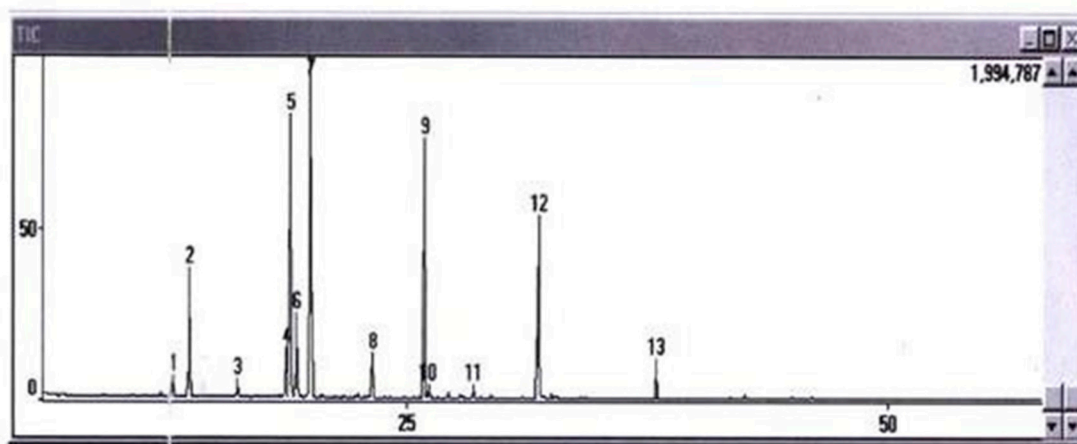

| Peak No | % SI | Retention time (min) | % Total Area | Possible compounds      |
|---------|------|----------------------|--------------|-------------------------|
| 1       | 89   | 12.811               | 1.02         | $\alpha$ -Pinene        |
| 2       | 94   | 13.680               | 7.42         | Camphene                |
| 3       | 87   | 16.176               | 0.99         | $\beta$ -Myrcene        |
| 4       | 95   | 18.713               | 3.23         | Limonene                |
| 5       | 91   | 18.933               | 18.04        | Eucalyptol              |
| 6       | 87   | 19.266               | 4.96         | cis- $\beta$ -Ocimene   |
| 7       | 92   | 19.991               | 25.77        | trans- $\beta$ -Ocimene |
| 8       | 90   | 23.220               | 2.27         | Linalool                |
| 9       | 89   | 25.929               | 19.94        | Camphor                 |
| 10      | 81   | 26.157               | 0.65         | Isothujol               |
| 11      | 82   | 28.514               | 0.71         | $\alpha$ -Terpineol     |
| 12      | 91   | 31.882               | 12.87        | trans-Geraniol          |
| 13      | 89   | 38.000               | 2.14         | Methyl cinnamate        |
|         |      |                      | 100          |                         |

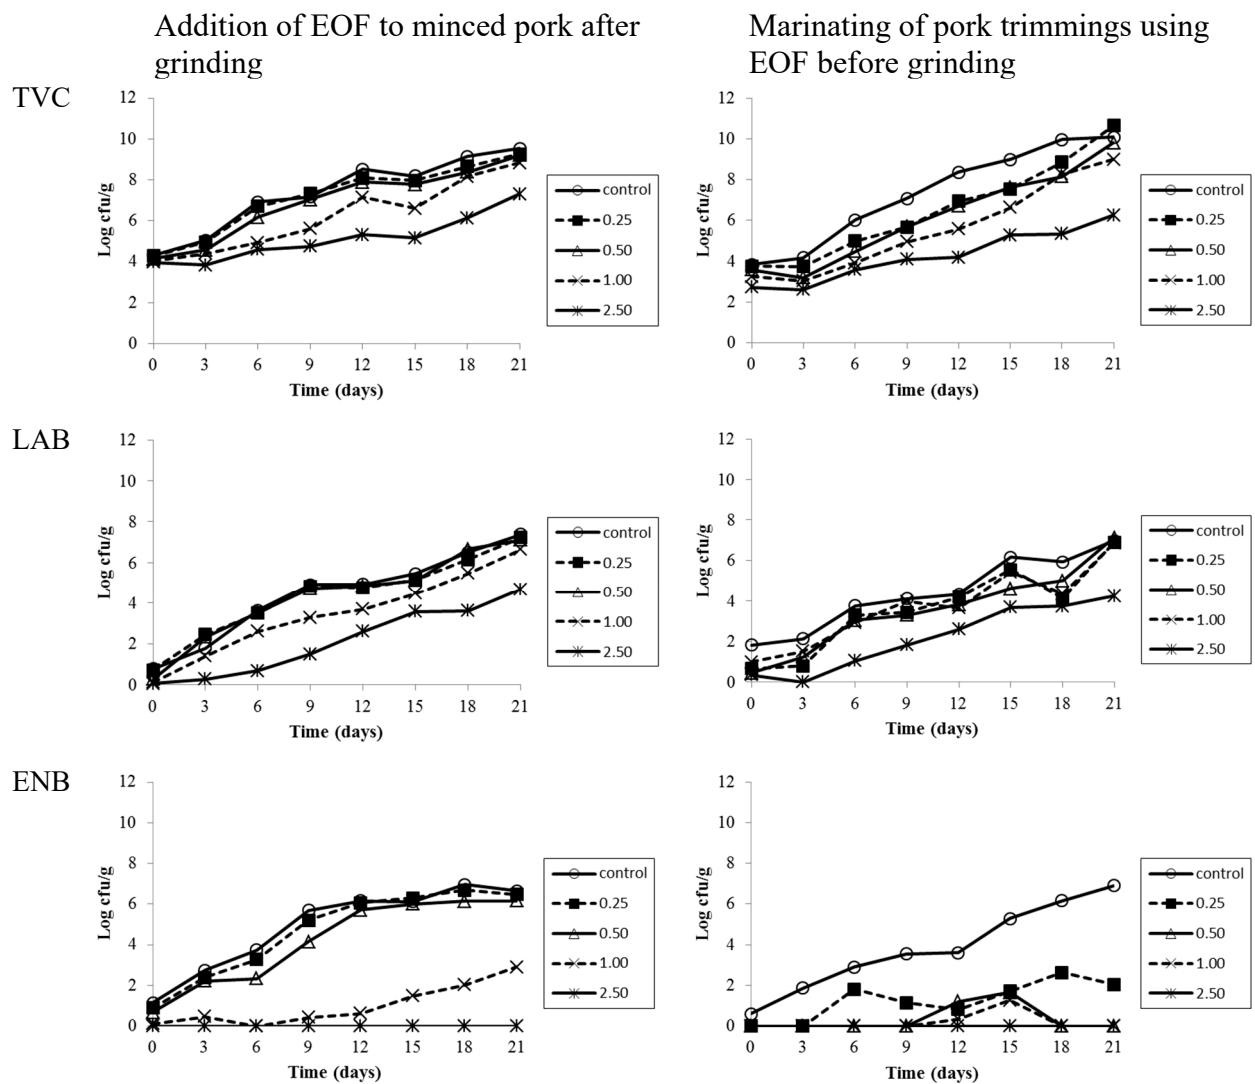

Figure S2. Total viable count (TVC), lactic acid bacteria (LAB) and Enterobacteriaceae bacteria (ENB) in uncooked pork meatballs of the control (without EOF) and added EOF with the concentrations of 0.25, 0.50, 1.00 and 2.50 wt% by marinating (before grinding) and adding after grinding during storage at  $6 \pm 1$  °C for 21 days.

Table S1. Recoveries of HAs in pan-fried meatballs (mean and SD standard deviation)

| HAs         | EOF Concentrations |          |         |         |         | Mean   | SD     | Coefficient of variation |
|-------------|--------------------|----------|---------|---------|---------|--------|--------|--------------------------|
|             | Control            | 0.25 wt% | 0.5 wt% | 1.0 wt% | 2.5 wt% |        |        |                          |
| IQ          | 52.6 %             | 57.8 %   | 57.6 %  | 52.5 %  | 58.7 %  | 55.8 % | 3.0 %  | 5.4 %                    |
| IQx         | 35.2 %             | 38.6 %   | 38.6 %  | 30.2 %  | 37.2 %  | 36.0 % | 3.5 %  | 9.7 %                    |
| MeIQ        | 49.6 %             | 58.8 %   | 58.8 %  | 58.3 %  | 50.5 %  | 55.2 % | 4.7 %  | 8.5 %                    |
| MeIQx       | 61.9 %             | 65.5 %   | 65.5 %  | 61.5 %  | 61.4 %  | 63.2 % | 2.2 %  | 3.5 %                    |
| 7,8-DiMeIQx | 62.2 %             | 60.3 %   | 60.3 %  | 63.6 %  | 63.1 %  | 61.9 % | 1.6 %  | 2.5 %                    |
| 4,8-DiMeIQx | 69.9 %             | 66.5 %   | 66.5 %  | 69.6 %  | 73.6 %  | 69.2 % | 3.0 %  | 4.3 %                    |
| Glu-P-2     | 58.8 %             | 42.7 %   | 36.9 %  | 50.1 %  | 44.1 %  | 46.5 % | 8.3 %  | 17.9 %                   |
| Glu-P-1     | 50.4 %             | 38.0 %   | 33.1 %  | 45.0 %  | 40.3 %  | 41.3 % | 6.6 %  | 16.0 %                   |
| Norharman   | 88.9 %             | 80.8 %   | 83.4 %  | 114.7 % | 78.0 %  | 89.2 % | 14.9 % | 16.7 %                   |
| Harman      | 80.5 %             | 73.6 %   | 73.8 %  | 75.1 %  | 71.5 %  | 74.9 % | 3.4 %  | 4.5 %                    |
| Trp-P-2     | 61.3 %             | 61.3 %   | 66.5 %  | 52.9 %  | 48.9 %  | 58.2 % | 7.1 %  | 12.2 %                   |
| PhIP        | 41.7 %             | 41.6 %   | 30.7 %  | 46.2 %  | 40.9 %  | 40.2 % | 5.7 %  | 14.2 %                   |
| Trp-P-1     | 54.1 %             | 61.3 %   | 61.2 %  | 54.1 %  | 46.4 %  | 55.4 % | 6.2 %  | 11.2 %                   |
| AaC         | 105.9 %            | 60.4 %   | 70.6 %  | 56.1 %  | 73.9 %  | 73.7 % | 22.2 % | 24.7 %                   |
| MeAaC       | 66.4 %             | 65.0 %   | 67.7 %  | 49.9 %  | 34.4 %  | 56.7 % | 14.4 % | 25.4 %                   |
