# Supplementary material for: Effects of Fingerroot (Boesenbergia pandurata) Oil on Microflora as an Antimicrobial Agent and on the Formation of Heterocyclic Amines in Fried Meatballs
Source: MDPI journal article supplement (doi:10.3390/app14020712), 2024-01-14
Supplement: s1 [file s1]

Archive with 1 entries (1 files):
- applsci-2776154-supplementary.pdf
